# Supplementary material
Source: Springer Nature journal article supplement (https://www.springermedizin.de/resource/supplementary/12967_2014_1787_MOESM7_ESM.pdf/9575300)

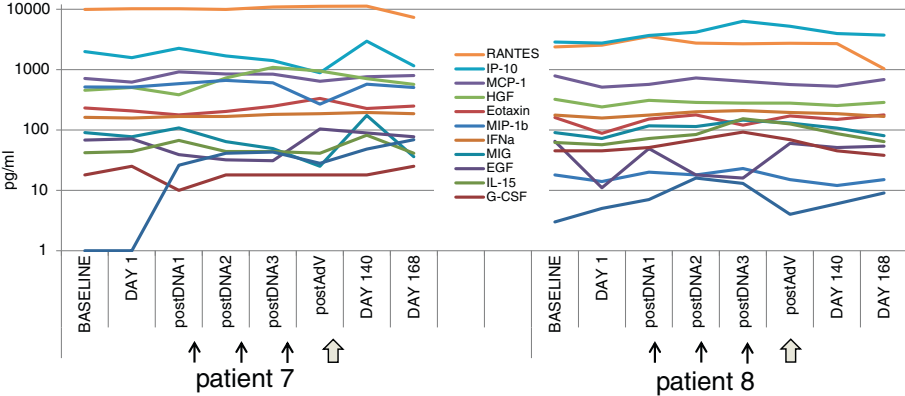

Supplement: MOESM7 [file 9575300]
